# Supplementary material for: Low-temperature solution-processed SnO2 electron transport layer modified by oxygen plasma for planar perovskite solar cells
Source: Royal Society of Chemistry journal article supplement (doi:10.1039/d1ra08946c), 2022-01-01
Supplement: d1ra08946c1.pdf [file d1ra08946c1.pdf]

## Supporting Information

### Low-temperature solution-processed SnO<sub>2</sub> electron transport layer modified by oxygen plasma for planar perovskite solar cells

*Akshaiya Padmalatha Muthukrishnan<sup>1</sup>, Junyeoung Lee<sup>1</sup>, Jongbok Kim<sup>2</sup>, Chang Su Kim<sup>3</sup>, and Sungjin Jo<sup>1,\*</sup>*

<sup>1</sup>School of Energy Engineering, Kyungpook National University, Daegu 41566, Republic of Korea

<sup>2</sup>Department of Materials Science and Engineering, Kumoh National Institute of Technology, Gumi 39177, Republic of Korea

<sup>3</sup>Department of Advanced Functional Thin Films, Surface Technology Division, Korea Institute of Materials Science, 797 Changwondaero, Sungsan-Gu, Changwon, Gyeongnam 51508, Republic of Korea

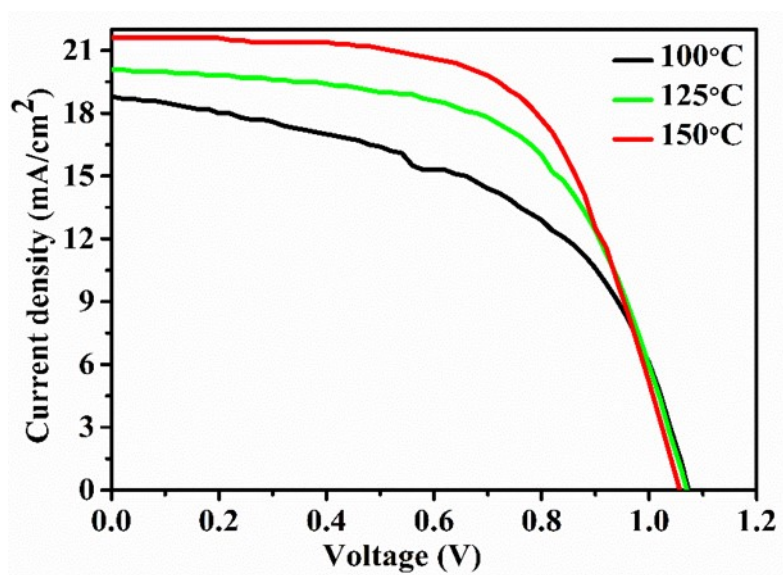

Figure S1. *J-V* characteristics of PSCs based on LTP-SnO<sub>2</sub> annealed at various temperatures ranging from 100°C to 150°C.

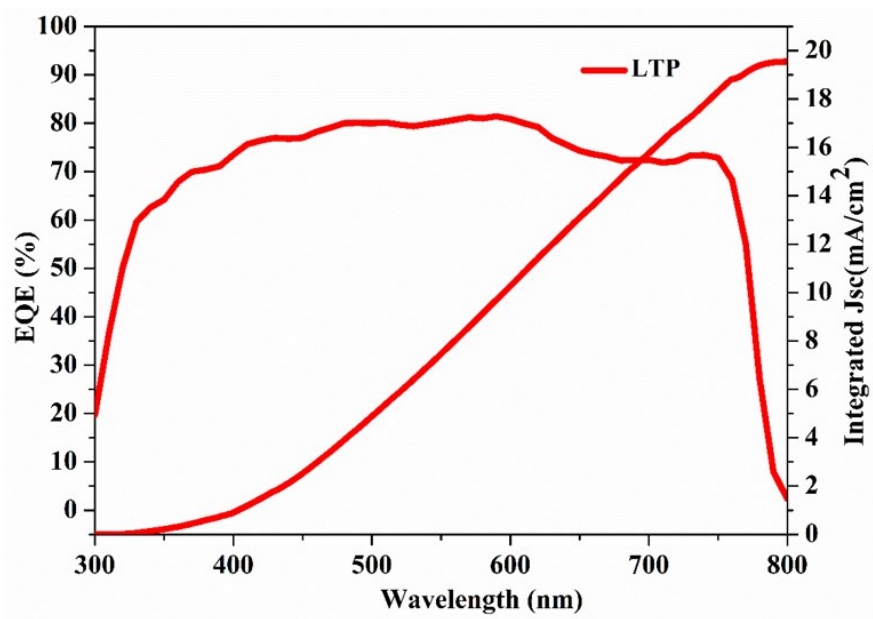

**Figure S2.** EQE spectra of LTP-PSCs and integrated  $J_{sc}$ .

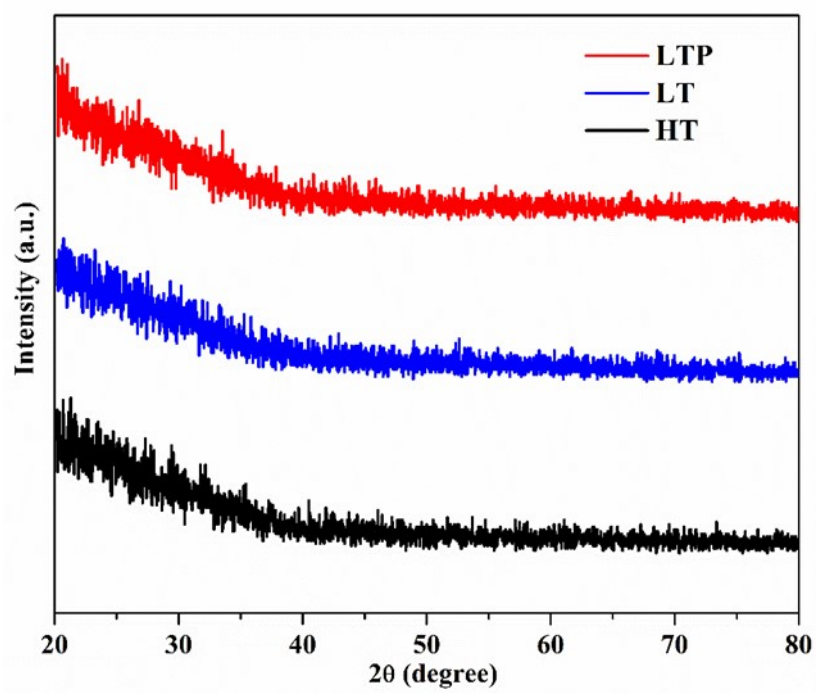

**Figure S3.** XRD pattern of HT-, LT-, and LTP-SnO<sub>2</sub>.

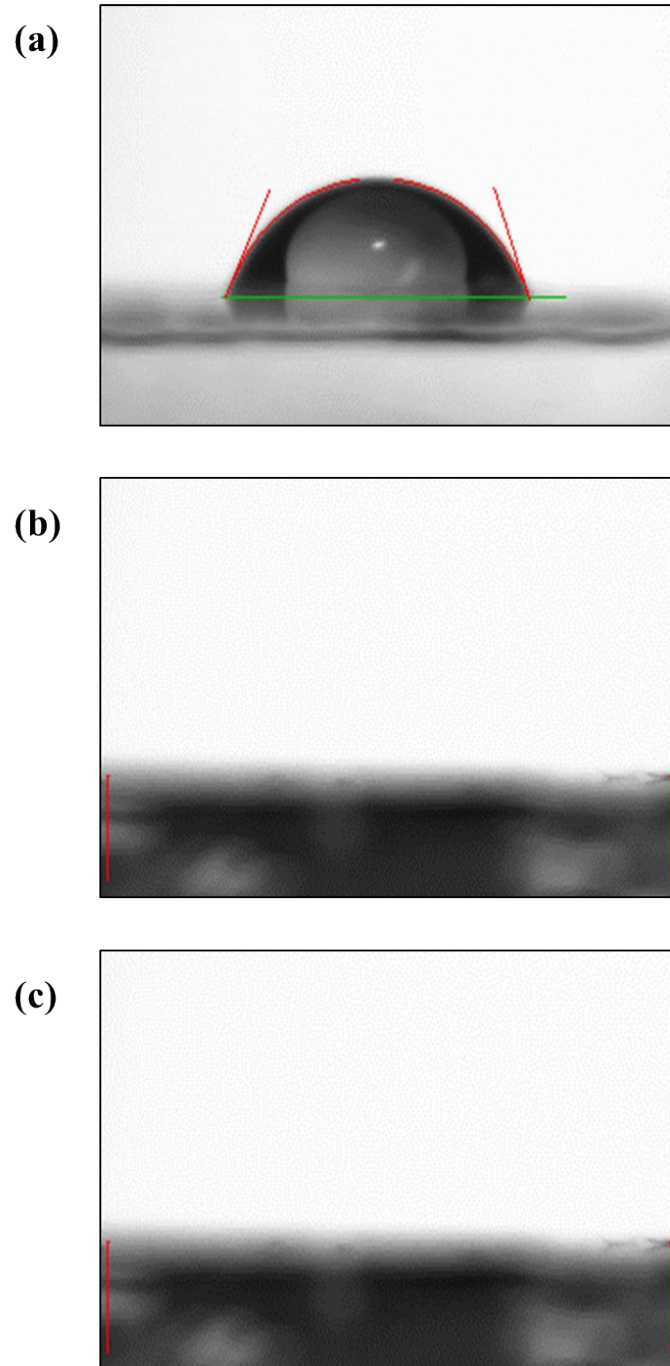

**Figure S4. Measured contact angle of water droplets on (a) LT-, (b) LTP-, and (c) HT-SnO<sub>2</sub>.**

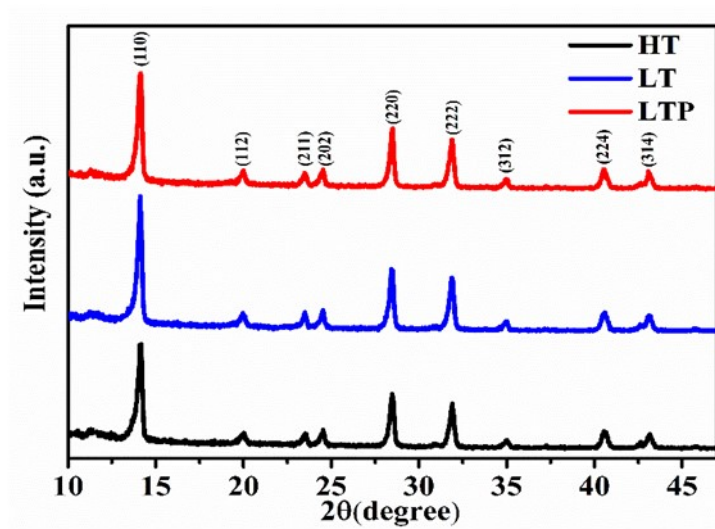

Figure S5. XRD pattern of MAPbI<sub>3</sub> layers deposited on HT-, LT-, and LTP-SnO<sub>2</sub>.

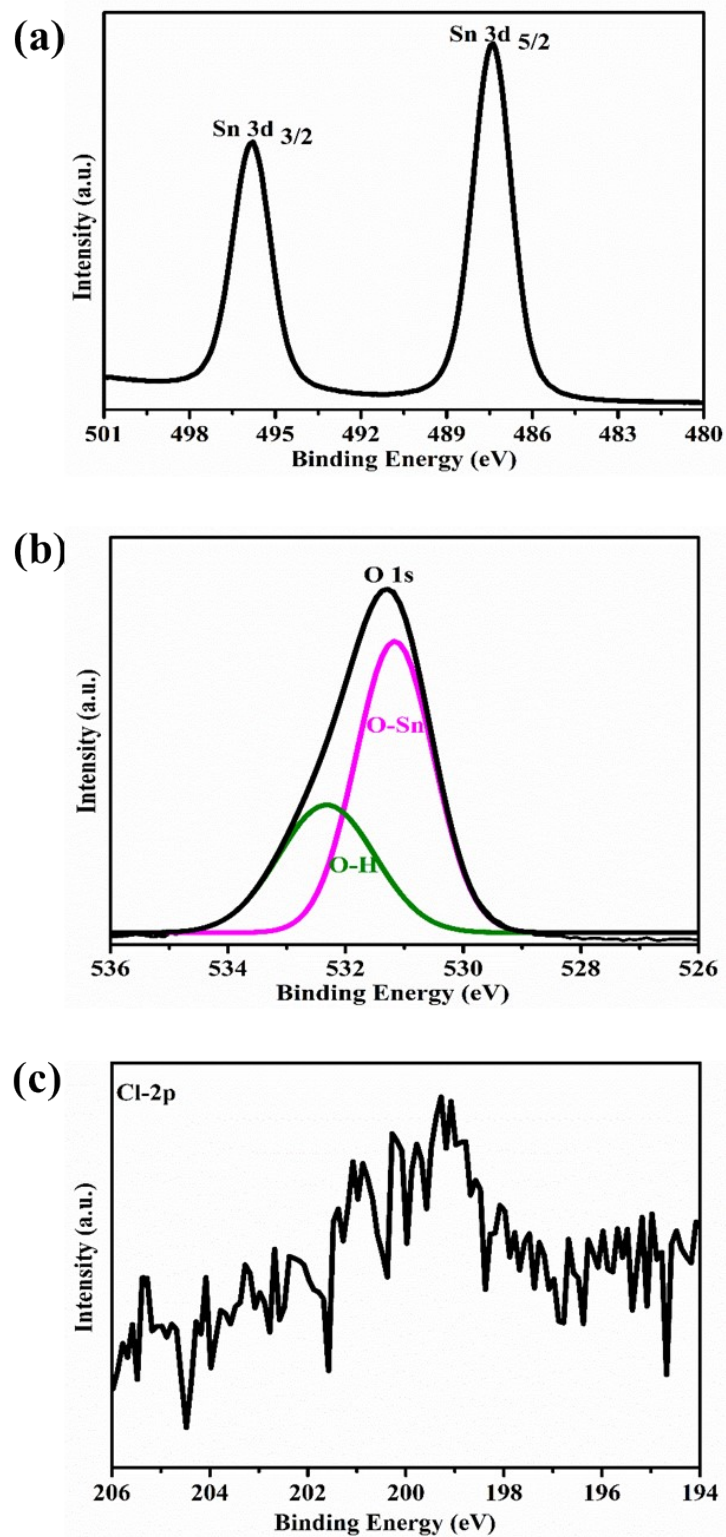

Figure S6. XPS spectra of (a) Sn 3d (b) O 1s and (c) Cl 2p from HT-SnO<sub>2</sub>.

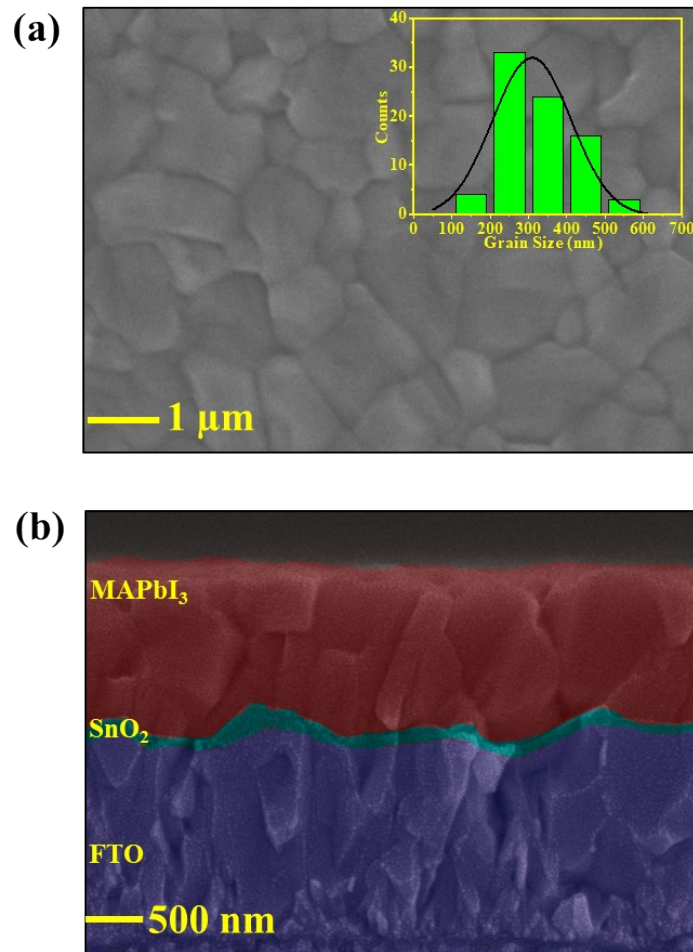

**Figure S7. (a) Top view SEM images and grain size distribution histograms (inset) of MAPbI<sub>3</sub> deposited on HT-SnO<sub>2</sub>. (b) Corresponding cross sectional SEM images of MAPbI<sub>3</sub> deposited on HT--SnO<sub>2</sub>.**



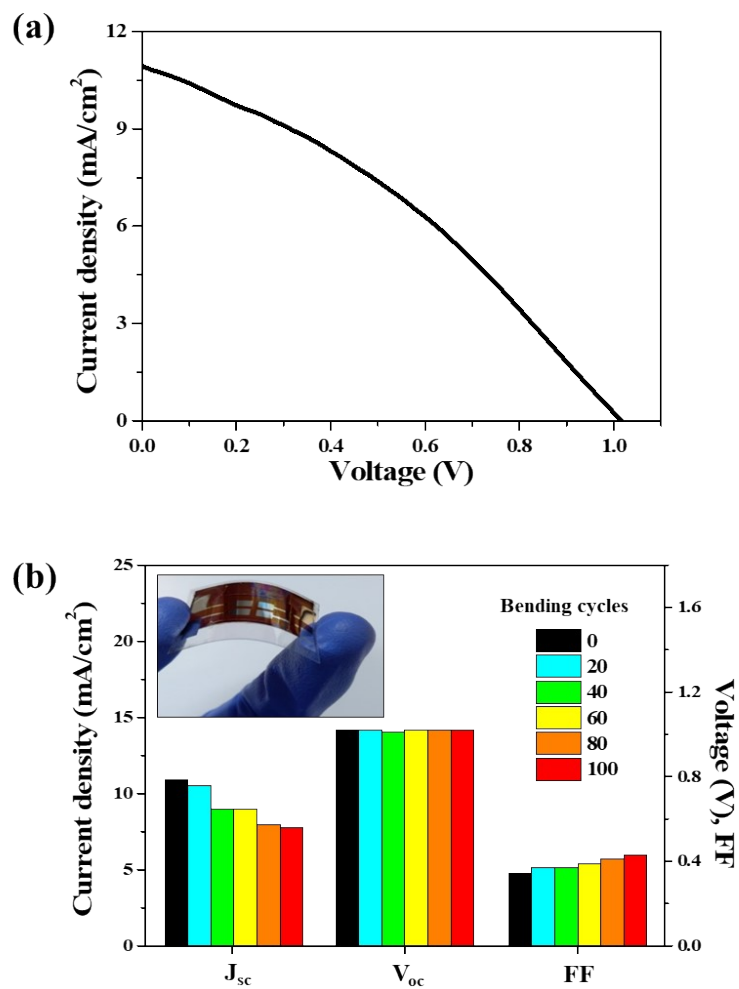

**Figure S8. (a)  $J$ - $V$  graph for flexible PSC based on LTP-SnO<sub>2</sub> ETL and (b) bending cycle test results.**

**Table S1. Averaged photovoltaic performance parameters of PSCs obtained from 20 cells.**

| Device               | $J_{sc}$<br>(mA/cm <sup>2</sup> ) | $V_{oc}$<br>(V) | Fill factor | Efficiency<br>(%) |
|----------------------|-----------------------------------|-----------------|-------------|-------------------|
| HT-SnO <sub>2</sub>  | 21.25±0.5                         | 1.02±0.05       | 0.61±0.04   | 13.25±1.0         |
| LT-SnO <sub>2</sub>  | 19.04±1.0                         | 0.29±0.06       | 0.33±0.02   | 1.82±0.43         |
| LTP-SnO <sub>2</sub> | 21.16±0.8                         | 1.06±0.02       | 0.63±0.05   | 14.16±0.82        |

**Table S2. Device parameters of PSC at different temperatures using oxygen plasma treatment.**

| Device | $J_{sc}$<br>(mA/cm <sup>2</sup> ) | $V_{oc}$<br>(V) | Fill factor | Efficiency<br>(%) |
|--------|-----------------------------------|-----------------|-------------|-------------------|
| 100°C  | 18.83                             | 1.07            | 0.51        | 10.30             |
| 125°C  | 20.14                             | 1.07            | 0.60        | 12.86             |
| 150°C  | 21.61                             | 1.06            | 0.62        | 14.30             |

**Table S3. The parameters of TRPL spectra.**

| Device               | A1(%) | $\tau_1$ (ns) | A2(%) | $\tau_2$ (ns) | A3(%) | $\tau_3$ (ns) | $\tau_{\text{Avg}}$ (ns) |
|----------------------|-------|---------------|-------|---------------|-------|---------------|--------------------------|
| HT-SnO <sub>2</sub>  | 46    | 2.84          | 53    | 11.5          | 1     | 134           | 18                       |
| LT-SnO <sub>2</sub>  | 40    | 2.48          | 59    | 11.5          | 1     | 138           | 18                       |
| LTP-SnO <sub>2</sub> | 49    | 2.28          | 50    | 7.24          | 1     | 121           | 15                       |

**Table S4. EIS fitted parameters.**

| Device               | R <sub>s</sub> (Ω) | R <sub>rec</sub> (Ω) |
|----------------------|--------------------|----------------------|
| HT-SnO <sub>2</sub>  | 25.43              | 1961                 |
| LT-SnO <sub>2</sub>  | 30.95              | 19.37                |
| LTP-SnO <sub>2</sub> | 19.69              | 3669                 |
